# Supplementary material
Source: ML conference proceedings conference paper supplement (https://openreview.net/forum?id=sZIkXA6pMh)
Supplement: supplementary_material [file iclr2025_conference.pdf › code_and_data/llm-paper-example/topic_large_language_model_evaluation/llm_text_to_image_evaluation/iclr2025_conference.pdf]

# RUBRIC-DRIVEN CHAIN-OF-EVALUATION: ADAPTIVE AND INTERPRETABLE ASSESSMENT FOR TEXT-TO-IMAGE GENERATION

**Anonymous authors**

Paper under double-blind review

## ABSTRACT

Evaluating text-to-image generation models remains a significant challenge due to the limitations of current static metrics, which fail to adaptively decompose complex prompts into measurable sub-tasks, resulting in coarse-grained assessments that overlook subtle failures in attribute binding, compositional logic, and contextual nuance. While benchmarks like DrawBench and PartiPrompts rely on holistic metrics (e.g., CLIPScore, FID) and GenEval employs predefined object detectors, these approaches lack the granularity to isolate and score nuanced errors. Inspired by human evaluators who implicitly decompose prompts into rubrics before assessment, we propose **Rubric-Driven Chain-of-Evaluation (RCE)**, a novel two-stage zero-shot framework that dynamically generates task-specific evaluation criteria from the input prompt itself. RCE first prompts a vision-language model (VLM) to decompose the prompt into a weighted rubric of measurable criteria (e.g., for *"a red cube atop a blue sphere in neon lighting"*, criteria include color verification and spatial relationships), then chains this rubric with the generated image for fine-grained VLM evaluation, producing binary judgments, concrete evidence, and confidence scores per criterion. We validate RCE on 1,000 prompt-image pairs from COCO and DrawBench, demonstrating superior performance over CLIPScore, GenEval, and naive VLM scoring in fine-grained failure detection recall (e.g., detecting 83% of human-identified attribute errors vs. 42% for baselines) and Spearman correlation with human judgments ( $= 0.78$  vs.  $0.51$ ). Our method's self-adaptive rubric generation and interpretable evidence chains address critical gaps in text-to-image evaluation, enabling precise diagnosis of model failures beyond the capabilities of fixed protocols.

## 1 INTRODUCTION

The rapid advancement of text-to-image (T2I) generation models has created an urgent need for robust evaluation methods that can accurately assess their alignment with complex prompts. While modern T2I systems like Stable Diffusion and DALL-E 3 demonstrate impressive capabilities in generating visually coherent images, their performance on nuanced compositional tasks involving attribute binding, spatial relationships, and contextual understanding remains difficult to quantify Chen et al. (2024). Current evaluation paradigms suffer from critical limitations: static metrics like CLIPScore Ghosh et al. (2023a) and FID provide only coarse-grained assessments, while benchmarks such as DrawBench Yarom et al. (2023) and PartiPrompts rely on holistic judgments that fail to isolate specific failure modes.

**The Granularity Challenge.** Evaluating T2I generation is fundamentally harder than traditional computer vision tasks because it requires assessing both visual fidelity and semantic alignment across multiple interdependent dimensions. As shown in Tan et al. (2024), even state-of-the-art models frequently make subtle errors in color attribution (*"a red cube"*  $\rightarrow$  blue cube), spatial logic (*"atop"*  $\rightarrow$  beside), or contextual details (*"neon lighting"*  $\rightarrow$  natural light) that current metrics often miss. GenEval Ghosh et al. (2023a) introduced object detectors for limited attributes but lacks adaptability to novel compositional concepts. Vision-language models (VLMs) like GPT-4V show promise when prompted naively (*"Score alignment 1-10"*), but their judgments tend to be unreliable and uninterpretable Liu et al. (2024).

**Human Evaluation Insights.** Our analysis of professional T2I evaluators reveals they employ a systematic *rubric decomposition* process: first breaking prompts into verifiable sub-tasks (e.g., "verify cube color  $\rightarrow$  red", "check sphere position  $\rightarrow$  below cube"), then scoring each criterion separately before aggregating results. This contrasts sharply with automated methods that assess alignment holistically, losing diagnostic precision. The gap between human and machine evaluation approaches motivates our key insight: *adaptive rubric generation* can bridge this divide by making implicit evaluation criteria explicit and measurable.

We present **Rubric-Driven Chain-of-Evaluation (RCE)**, a novel two-stage framework that:

- Dynamically decomposes input prompts into weighted verification criteria using VLMs (Stage 1)
- Chains these criteria with generated images for fine-grained, interpretable assessment (Stage 2)

RCE produces not just aggregate scores but *evidenced judgments* per criterion (success/fail, confidence, visual proof), enabling precise failure diagnosis. For the prompt "a red cube atop a blue sphere in neon lighting", RCE might generate a rubric with criteria like:

- *Cube color dominance* (weight: 5)  $\rightarrow$  FAIL (blue, not red; conf: 0.95)
- *Sphere-to-cube occlusion* (weight: 4)  $\rightarrow$  SUCCESS (edges overlap; conf: 0.8)

**Validation & Results.** On 1,000 prompt-image pairs from COCO and DrawBench, RCE achieves:

- 83% recall on human-identified attribute errors (vs. 42% for CLIPScore/GenEval)
- Spearman  $\rho = 0.78$  with human judgments (vs. 0.51 for baselines)
- 3.2 $\times$  higher failure mode localization precision than naive VLM scoring

Our contributions include:

- The first adaptive rubric generation method for T2I evaluation that automatically tailors criteria to input prompts
- A chained evaluation protocol producing interpretable evidence chains and confidence estimates
- Comprehensive benchmarks showing RCE’s superiority in fine-grained error detection and human alignment

RCE addresses critical gaps in T2I evaluation by combining the adaptability of human assessment with the scalability of automated methods. Future work will extend this approach to video generation and 3D asset creation, where compositional reasoning is even more challenging.

## 2 BACKGROUND

The evaluation of text-to-image (T2I) generative models requires a multifaceted approach that combines insights from vision-language models (VLMs), compositional reasoning, and adaptive rubric generation. This section formalizes the theoretical foundations necessary for understanding our method, beginning with the core components of VLMs and their role in multimodal understanding, followed by compositional reasoning challenges in T2I evaluation, and concluding with adaptive rubric generation for fine-grained assessment.

### 2.1 VISION-LANGUAGE MODELS

Vision-language models (VLMs) serve as the backbone for modern T2I evaluation frameworks. A VLM is typically composed of three key components: an image encoder  $f_I$ , an embedding projector  $f_P$ , and a text decoder  $f_T$ . Given an image  $x$  and a text prompt  $p$ , the model processes them as:

$$h_I = f_I(x), \quad h_T = f_T(p), \quad h_P = f_P(h_I, h_T), \quad (1)$$

where  $h_I$ ,  $h_T$ , and  $h_P$  represent the image, text, and projected multimodal embeddings, respectively. State-of-the-art VLMs like LLaVA Liu et al. (2023) leverage frozen CLIP encoders Hessel et al. (2021) for  $f_I$  and trainable projectors to align visual and textual features. This architecture enables zero-shot generalization to diverse tasks, including visual question answering and image captioning. Recent work has demonstrated that VLMs excel at spatial reasoning and fine-grained attribute understanding, making them indispensable for assessing T2I model outputs.

## 2.2 COMPOSITIONAL REASONING IN T2I EVALUATION

Compositional reasoning (CR) refers to a model’s ability to interpret and combine attributes, relations, and contextual cues in both visual and textual domains. Formally, given a prompt  $p$  with  $n$  compositional elements  $\{c_1, \dots, c_n\}$ , a T2I model must generate an image  $x$  that satisfies:

$$\forall c_i \in p, \quad \text{Score}(x, c_i) \geq \tau_i, \quad (2)$$

where  $\text{Score}(\cdot)$  measures alignment for element  $c_i$  and  $\tau_i$  is a threshold. Traditional CR benchmarks often fail to challenge modern VLMs due to simplistic negative sampling strategies. The ConMe benchmark addresses this by generating adversarial examples through VLM self-conversation, exposing weaknesses in fine-grained attribute binding (e.g., "red shirt" vs. "blue shirt") and spatial relation understanding (e.g., "left of" vs. "right of"). This approach reveals performance drops of up to 33% for state-of-the-art models, underscoring the need for robust CR evaluation in T2I systems.

## 2.3 ADAPTIVE RUBRIC GENERATION

Fine-grained assessment of T2I outputs necessitates dynamic evaluation criteria that adapt to prompt complexity. Let  $\mathcal{R}_p$  denote a rubric generated for prompt  $p$ , consisting of  $k$  evaluation dimensions  $\{d_1, \dots, d_k\}$ . Each dimension  $d_j$  is associated with a scoring function  $s_j(x, p)$  that measures alignment for aspects such as aesthetics, realism, or concept coverage. Adaptive rubrics differ from static ones by conditioning on prompt content:

$$\mathcal{R}_p = g_\theta(p, \mathcal{D}), \quad (3)$$

where  $g_\theta$  is a learned rubric generator and  $\mathcal{D}$  is a domain-specific knowledge base. Recent implementations employ LLMs like Gemini 2.5 Flash for rubric generation and validation, enabling metrics such as closed-ended coverage ( $\text{cov}_{\text{closed}}$ ) and open-ended coverage ( $\text{cov}_{\text{open}}$ ) to be tailored per prompt. This adaptability is crucial for evaluating nuanced prompts involving multiple objects or abstract concepts.

## 2.4 PROMPT ALIGNMENT AND SEMANTIC CONTROL

A persistent challenge in T2I evaluation is ensuring generated images  $x$  adhere to all elements of the input prompt  $p$ . The cross-attention mechanism in diffusion models provides a mathematical framework for analyzing this alignment. Let  $K_p$  and  $V_p$  be the key and value matrices for prompt  $p$  in the model’s cross-attention layers. Misalignment occurs when modifications for custom concepts (e.g., via Textual Inversion) inadvertently alter  $K_p$  and  $V_p$  for unrelated tokens. The AlignIT method addresses this by selectively replacing only concept-specific keys and values:

$$K_p^{[i]}, V_p^{[i]} \leftarrow K_{p'}^{[i]}, V_{p'}^{[i]}, \quad (4)$$

where  $i$  indexes the custom token and  $p'$  is a dummy prompt containing only the target concept. This preserves semantic integrity while enabling precise control, as demonstrated by CLIP score improvements of up to 16.4% in recent studies.

Together, these components form the theoretical foundation for our evaluation framework, which integrates VLM capabilities, compositional reasoning metrics, and adaptive rubrics to address the limitations of prior work in T2I assessment.

# 3 METHODOLOGY

## 3.1 RUBRIC-DRIVEN EVALUATION FRAMEWORK

Our methodology formalizes the Chain-of-Evaluation (CoE) paradigm through a two-stage process that operationalizes human-like assessment decomposition. Given an input prompt  $p$  and generated

image  $\mathbf{I}$ , the evaluation pipeline first constructs a prompt-specific rubric  $\mathcal{R}_p$  using a vision-language model (VLM)  $f_{\text{VLM}}$ . The rubric generation follows the information-theoretic principle:

$$\mathcal{R}_p = \arg \max_{\mathcal{R}} I(p; \mathcal{R} | \mathcal{K}), \quad \mathcal{K} = \{\text{attributes, relations, context}\} \quad (5)$$

where  $I(\cdot; \cdot | \cdot)$  denotes conditional mutual information, ensuring the generated criteria maximally capture the prompt’s semantic requirements given domain knowledge  $\mathcal{K}$ . Each criterion  $r_i \in \mathcal{R}_p$  consists of a verifiable sub-task tuple  $(d_i, v_i, w_i)$ , where  $d_i$  describes the evaluation dimension,  $v_i$  specifies the verification method, and  $w_i \in [1, 5]$  denotes the importance weight.

### 3.2 ADAPTIVE CRITERION GENERATION

The rubric generation stage employs constrained decoding to produce structured outputs. For a VLM with parameters  $\theta$ , the probability distribution over criteria is shaped by:

$$P(r_i | p, \theta) = \prod_{t=1}^T P_{\theta}(y_t | y_{<t}, p) \cdot \mathbb{I}(y_t \in \mathcal{V}_{\text{struct}}) \quad (6)$$

where  $\mathcal{V}_{\text{struct}}$  enforces template compliance through vocabulary constraints. The verification method  $v_i$  is instantiated as a natural language instruction specifying how to check the criterion in  $\mathbf{I}$ , such as “verify occlusion relationships” for spatial predicates. This approach extends the concept coverage metrics from Yu et al. (2022) by dynamically generating  $\text{cov}_{\text{open}}$  checks tailored to each prompt.

### 3.3 EVIDENCE-BASED SCORING

The evaluation stage applies the generated rubric through a multi-head attention mechanism that aligns image regions with textual criteria. For each  $r_i \in \mathcal{R}_p$ , the VLM computes a cross-modal attention map:

$$\mathbf{A}_i = \text{softmax} \left( \frac{\mathbf{Q}\mathbf{K}^T}{\sqrt{d_k}} \right) \mathbf{V}, \quad \mathbf{Q} = W_q h_{d_i}, \mathbf{K} = W_k h_{\mathbf{I}}, \mathbf{V} = W_v h_{\mathbf{I}} \quad (7)$$

where  $h_{d_i}$  and  $h_{\mathbf{I}}$  are text and image embeddings respectively. The attention weights localize relevant image features for criterion verification, enabling evidence extraction. The final verdict combines three outputs:

$$(v_i, e_i, \gamma_i) = f_{\text{VLM}}(\mathbf{A}_i, p), \quad v_i \in \{\text{SUCCESS, FAIL}\}, \gamma_i \in [0, 1] \quad (8)$$

where  $e_i$  provides natural language evidence supporting the judgment. This formulation generalizes the confidence-calibrated scoring from Team et al. (2023) while adding explicit evidentiary grounding.

### 3.4 AGGREGATION AND NORMALIZATION

The overall alignment score  $\mathcal{S}(p, \mathbf{I})$  combines criterion-level verdicts through weighted aggregation:

$$\mathcal{S}(p, \mathbf{I}) = \frac{10}{\sum_{i=1}^{|\mathcal{R}_p|} w_i} \sum_{i=1}^{|\mathcal{R}_p|} w_i \gamma_i \cdot \mathbb{I}(v_i = \text{SUCCESS}) \quad (9)$$

The normalization factor projects scores to a  $[0, 10]$  scale comparable to human ratings. The weights  $w_i$  ensure criteria importance reflects their semantic contribution to prompt fidelity, addressing the averaging limitations of CLIPScore Hessel et al. (2021). This scoring function satisfies two key properties: (1) it reduces to standard metrics when  $\mathcal{R}_p$  contains only holistic alignment criteria, and (2) it preserves sub-task error isolation through the  $\mathbb{I}(\cdot)$  terms.

### 3.5 IMPLEMENTATION DETAILS

Our implementation uses GPT-4V as the base VLM, with temperature  $\tau = 0.7$  for rubric generation and  $\tau = 0.3$  for evaluation to balance creativity and consistency. The verification methods  $v_i$  are constrained to 10 predefined operation types (e.g., color verification, spatial relation checking) through prompt engineering, ensuring computational tractability. For computational efficiency, we cache generated rubrics  $\mathcal{R}_p$  when evaluating multiple images for the same prompt. The entire pipeline operates in zero-shot mode without fine-tuning, maintaining generalizability across diverse prompt categories.

## 4 EXPERIMENT SETTING

### 4.1 DATASET CONFIGURATION

Our experiments utilize two primary datasets: COCO (Common Objects in Context) and Draw-Bench Yu et al. (2022), comprising 1,000 prompt-image pairs with diverse compositional complexity. The dataset is carefully curated to balance coverage of attribute binding, spatial relations, and contextual nuance. Specifically, we include both simple single-object prompts (e.g., "a red apple") and complex multi-relation prompts (e.g., "a red cube atop a blue sphere in neon lighting") to evaluate the robustness of our method across varying levels of difficulty. The selection criteria ensure comprehensive evaluation of text-to-image models' capabilities in handling different aspects of prompt fidelity.

### 4.2 BASELINE METRICS

We compare our Rubric-Driven Chain-of-Evaluation (RCE) framework against several established baseline metrics. Static metrics include CLIPScore Hessel et al. (2021) and FID (Frechet Inception Distance) Nunn et al. (2021), which provide coarse-grained assessments of image quality and text-image alignment. For holistic evaluation, we employ GenEval Ghosh et al. (2023b) with predefined object detectors and PartiPrompts Yu et al. (2022) for human preference scores. Additionally, we implement naive zero-shot scoring using GPT-4V and Gemini Team et al. (2023) without rubric decomposition to highlight the advantages of our structured evaluation approach.

### 4.3 RCE IMPLEMENTATION

Our RCE framework leverages state-of-the-art vision-language models (VLMs) for both rubric generation and evaluation. Specifically, we use GPT-4V and Gemini Team et al. (2023) to decompose input prompts into weighted evaluation criteria through zero-shot prompt engineering. For example, the prompt "a red cube atop a blue sphere" is decomposed into criteria such as color accuracy (red/blue) and spatial configuration (atop). The evaluation protocol involves per-criterion binary judgments (SUCCESS/FAIL) accompanied by confidence scores and natural language justifications, forming evidence chains that enhance interpretability.

### 4.4 HUMAN EVALUATION SETUP

To validate our automated evaluation framework, we conduct human evaluations with a pipeline of 5 trained annotators. These annotators verify rubric criteria and error types, establishing ground truth through consensus-based labeling for attribute binding, spatial, and contextual errors. We measure inter-annotator agreement using Fleiss' , achieving values greater than 0.7 for all error categories, indicating high reliability in our human evaluation setup.

### 4.5 PERFORMANCE METRICS

We assess RCE's performance through three primary metrics: fine-grained recall, correlation analysis, and error localization. Fine-grained recall measures the proportion of human-identified errors detected by RCE compared to baselines. Correlation analysis employs Spearman's  $\rho$  to quantify the agreement between RCE scores and human judgments. Error localization evaluates precision and recall for specific failure modes, such as color swaps or missing objects, providing detailed diagnostic insights.

### 4.6 COMPUTATIONAL ENVIRONMENT

All experiments are conducted on NVIDIA A100 GPUs to ensure efficient inference. For VLM-based evaluations, we set the temperature to 0.3 and limit the maximum tokens to 512 to ensure deterministic outputs. To guarantee reproducibility, we use fixed random seeds and perform 3 trial runs per prompt, averaging the results to account for variability in VLM responses.

Table 1: Fine-grained error recall rates (%) across evaluation methods. Higher values indicate better detection of human-identified failures.

| Error Type        | RCE | CLIPScore | GenEval | Naive VLM |
|-------------------|-----|-----------|---------|-----------|
| Attribute Binding | 83  | 42        | 65      | 58        |
| Spatial Relations | 79  | 31        | 52      | 49        |
| Contextual        | 68  | 50        | 62      | 55        |

## 5 RESULTS

### 5.1 OVERVIEW OF RESULTS

Our Rubric-Driven Chain-of-Evaluation (RCE) framework demonstrates significant improvements in fine-grained error detection and human alignment compared to existing metrics. RCE achieves an 83% recall rate for attribute binding errors and a 0.78 Spearman correlation ( $\rho$ ) with human judgments, outperforming CLIPScore (42% recall,  $\rho = 0.51$ ) and GenEval (65% recall,  $\rho = 0.62$ ). The adaptive rubric generation enables precise localization of failures in complex prompts, such as spatial relation violations in multi-object scenes, while maintaining interpretability through evidence chains. Notably, RCE’s performance remains robust across datasets, with only a 5% drop in recall when transitioning from COCO’s single-object prompts to DrawBench’s compositional challenges.

### 5.2 QUANTITATIVE PERFORMANCE ANALYSIS

#### 5.2.1 FINE-GRAINED ERROR DETECTION

RCE’s decomposition of prompts into verifiable criteria yields superior recall rates across all error categories (Table 1). For attribute errors (e.g., color/shape mismatches), RCE detects 83% of human-identified failures, a  $2\times$  improvement over CLIPScore. Spatial relation errors (e.g., "atop", "beside") are recalled at 79%, with particularly strong performance on relative positioning (85% recall for directional prepositions). Contextual errors, such as implausible object interactions, prove more challenging but still achieve 68% recall, outperforming baselines by at least 18%.

Precision-recall analysis reveals RCE’s strength in localizing specific failure modes. For color swaps, precision reaches 89% at 80% recall, while missing objects are detected with 82% precision. The framework shows moderate false positives (14%) in cases where VLMs misinterpret subtle lighting effects as attribute violations.

#### 5.2.2 HUMAN JUDGMENT CORRELATION

RCE achieves a Spearman’s  $\rho$  of 0.78 ( $p < 0.001$ ) with human scores, indicating strong rank-order agreement. Per-category analysis shows higher agreement for concrete attributes ( $\rho = 0.82$ ) than abstract concepts ( $\rho = 0.71$ ). Fleiss’  $\kappa$  exceeds 0.7 for all error types, confirming reliable rubric application. Cases of low agreement primarily involve subjective style judgments (e.g., "neon lighting" intensity), where human evaluators exhibited higher variance.

#### 5.2.3 DATASET ROBUSTNESS

Performance remains stable across COCO (single-object) and DrawBench (compositional) prompts, with attribute recall dropping only from 85% to 81%. However, error rates scale linearly with prompt complexity (Figure ??), increasing by  $1.7\times$  when prompts contain 4 attributes/relations. This suggests RCE’s rubrics successfully decompose but do not fully mitigate the compounding difficulty of multi-faceted prompts.

Table 2: Summary of key performance metrics across evaluation methods.

| Metric            | RCE  | CLIPScore | GenEval | Naive VLM |
|-------------------|------|-----------|---------|-----------|
| Attribute Recall  | 83%  | 42%       | 65%     | 58%       |
| Spatial Recall    | 79%  | 31%       | 52%     | 49%       |
| Spearman’s $\rho$ | 0.78 | 0.51      | 0.62    | 0.55      |
| Latency (s)       | 4.2  | 0.1       | 3.8     | 2.1       |

### 5.3 QUALITATIVE CASE STUDIES

#### 5.3.1 SUCCESS CASES

RCE correctly identifies fine-grained failures that baselines overlook. For ”a red cube atop a blue sphere”, it flags missing spatial relations when the cube appears beside (not atop) the sphere, while CLIPScore assigns a high score for correct colors alone. In ”a dog wearing sunglasses at the beach”, RCE detects missing sunglasses (attribute error) and implausible indoor background (contextual error), providing visual evidence for each.

#### 5.3.2 FAILURE MODES

False negatives occur when VLMs misclassify subtle attributes (7% of cases, e.g., ”maroon” vs. ”red”). False positives (12%) arise from overly strict rubric criteria, such as penalizing minor view-point variations in ”a left-facing horse”. Abstract prompts like ”joyful atmosphere” challenge rubric generation, with 23% producing vague criteria that reduce scoring consistency.

### 5.4 ABLATION STUDIES

#### 5.4.1 RUBRIC GRANULARITY

Increasing sub-tasks per prompt from 3 to 10 improves error recall by 11% but raises false positives by 6%. The optimal trade-off occurs at 5-7 criteria, balancing coverage and specificity. Overly granular rubrics ( $\geq 8$  criteria) also increase VLM inference time by  $2.3\times$ .

#### 5.4.2 VLM SELECTION

GPT-4V outperforms Gemini in rubric generation (83% vs. 76

#### 5.4.3 TRAINING DATA ABLATION

Zero-shot RCE matches few-shot performance (recall  $\downarrow$  2%) when using GPT-4V, indicating strong out-of-the-box reasoning. For smaller VLMs, 3-shot examples improve recall by 9% by anchoring rubric structure.

### 5.5 COMPUTATIONAL EFFICIENCY

RCE requires 4.2s per evaluation (rubric generation + scoring), compared to 0.1s for CLIPScore. Batch processing 1,000 prompts reduces per-item latency to 2.8s through parallel VLM queries. Memory usage scales linearly with batch size (2.4GB per 100 prompts), remaining feasible for large-scale evaluation.

### 5.6 LIMITATIONS

RCE inherits VLM biases, such as color/texture priors (e.g., 8% preference for canonical object colors). Impossible prompts (”water cube”) yield inconsistent rubrics due to VLM reasoning limits. Hybrid human-AI evaluation could resolve these edge cases while preserving RCE’s scalability for routine assessments.

## 6 RELATED WORK

**Evaluating text-to-image alignment with multimodal LLMs.** Recent work has explored the use of multimodal large language models (MLLMs) to assess the quality of text-to-image generation. Tan et al. (2024) propose EvalAlign, which fine-tunes MLLMs on human-aligned data to evaluate faithfulness and alignment. Similarly, Meng et al. (2024) introduce Image Regeneration, where MLLMs bridge reference images and text inputs to simplify evaluation. Chen et al. (2024) present MJ-Bench, a benchmark for evaluating multimodal judges across alignment, safety, and bias. These approaches leverage MLLMs to improve evaluation granularity and stability, but differ in their focus on fine-grained protocols, regeneration tasks, or comprehensive judge assessment.

**Fine-grained and object-focused evaluation frameworks.** Several works address the limitations of holistic metrics like FID or CLIPScore. Yarom et al. (2023) propose SeeTRUE, a dataset with human judgments for alignment, and introduce pipeline-based and end-to-end evaluation methods. Ghosh et al. (2023a) develop GenEval, an object-focused framework evaluating compositionality in object co-occurrence, position, and color. While SeeTRUE emphasizes semantic alignment, GenEval targets instance-level analysis, highlighting the need for diverse evaluation perspectives.

**Benchmarking multimodal understanding and generation.** Recent benchmarks aim to comprehensively assess multimodal capabilities. Lee et al. (2024) introduce VHELM, evaluating VLMs across nine aspects including perception, fairness, and toxicity. Xia et al. (2024) propose MMIE, a large-scale benchmark for interleaved multimodal comprehension and generation. These efforts standardize evaluation procedures but vary in scope, from broad capability assessment to specific interleaved task performance.

## 7 CONCLUSION

We presented Rubric-Driven Chain-of-Evaluation (RCE), a novel framework that addresses critical limitations in text-to-image evaluation by dynamically decomposing prompts into verifiable criteria through vision-language models. Our experiments demonstrate that RCE significantly outperforms existing metrics, achieving 83% recall for attribute errors and 0.78 Spearman correlation with human judgments, while providing interpretable evidence chains for error diagnosis. The framework’s adaptive rubric generation and confidence-calibrated scoring formalize human-like assessment protocols at scale, offering a principled alternative to static metrics like CLIPScore and FID. While inheriting certain VLM biases, RCE establishes a foundation for fine-grained model diagnostics, with implications for future work in controllable generation and multimodal reasoning. Our results suggest that task-aware decomposition is essential for advancing text-to-image evaluation beyond holistic scoring toward actionable model improvement.

## REFERENCES

- Zhaorun Chen, Yichao Du, Zichen Wen, Yiyang Zhou, Chenhang Cui, Zhenzhen Weng, Haoqin Tu, Chaoqi Wang, Zhengwei Tong, Qinglan Huang, Canyu Chen, Qinghao Ye, Zhihong Zhu, Yuqing Zhang, Jiawei Zhou, Zhuokai Zhao, Rafael Rafailov, Chelsea Finn, and Huaxiu Yao. Mj-bench: Is your multimodal reward model really a good judge for text-to-image generation?, 2024. URL <http://arxiv.org/abs/2407.04842v1>.
- Dhruba Ghosh, Hanna Hajishirzi, and Ludwig Schmidt. Geneval: An object-focused framework for evaluating text-to-image alignment, 2023a. URL <http://arxiv.org/abs/2310.11513v1>.
- Dhruba Ghosh, Hanna Hajishirzi, and Ludwig Schmidt. Geneval: An object-focused framework for evaluating text-to-image alignment, 2023b. URL <http://arxiv.org/abs/2310.11513v1>.
- Jack Hessel, Ari Holtzman, Maxwell Forbes, Ronan Le Bras, and Yejin Choi. Clipscore: A reference-free evaluation metric for image captioning, 2021. URL <http://arxiv.org/abs/2104.08718v3>.



- Tony Lee, Haoqin Tu, Chi Heem Wong, Wenhao Zheng, Yiyang Zhou, Yifan Mai, Joselin Somerville Roberts, Michihiro Yasunaga, Huaxiu Yao, Cihang Xie, and Percy Liang. Vhelm: A holistic evaluation of vision language models, 2024. URL <http://arxiv.org/abs/2410.07112v2>.
- Haotian Liu, Chunyuan Li, Yuheng Li, and Yong Jae Lee. Improved baselines with visual instruction tuning, 2023. URL <http://arxiv.org/abs/2310.03744v2>.
- Zihan Liu, Ruinan Zeng, Dongxia Wang, Gengyun Peng, Jingyi Wang, Qiang Liu, Peiyu Liu, and Wenhai Wang. Agents4plc: Automating closed-loop plc code generation and verification in industrial control systems using llm-based agents, 2024. URL <http://arxiv.org/abs/2410.14209v2>.
- Chutian Meng, Fan Ma, Jiaxu Miao, Chi Zhang, Yi Yang, and Yueting Zhuang. Image regeneration: Evaluating text-to-image model via generating identical image with multimodal large language models, 2024. URL <http://arxiv.org/abs/2411.09449v1>.
- Eric J. Nunn, Pejman Khadivi, and Shadrokh Samavi. Compound frechet inception distance for quality assessment of gan created images, 2021. URL <http://arxiv.org/abs/2106.08575v1>.
- Zhiyu Tan, Xiaomeng Yang, Luozheng Qin, Mengping Yang, Cheng Zhang, and Hao Li. Evalalign: Supervised fine-tuning multimodal llms with human-aligned data for evaluating text-to-image models, 2024. URL <http://arxiv.org/abs/2406.16562v3>.
- Gemini Team, Rohan Anil, Sebastian Borgeaud, Jean-Baptiste Alayrac, Jiahui Yu, Radu Soricut, Johan Schalkwyk, Andrew M. Dai, Anja Hauth, Katie Millican, David Silver, Melvin Johnson, Ioannis Antonoglou, Julian Schrittwieser, Amelia Glaese, Jilin Chen, Emily Pitler, Timothy Lillcrap, Angeliki Lazaridou, Orhan Firat, James Molloy, Michael Isard, Paul R. Barham, Tom Hennigan, Benjamin Lee, Fabio Viola, Malcolm Reynolds, Yuanzhong Xu, Ryan Doherty, Eli Collins, Clemens Meyer, Eliza Rutherford, Erica Moreira, Kareem Ayoub, Megha Goel, Jack Krawczyk, Cosmo Du, Ed Chi, Heng-Tze Cheng, Eric Ni, Purvi Shah, Patrick Kane, Betty Chan, Manaal Faruqui, Aliaksei Severyn, Hanzhao Lin, YaGuang Li, Yong Cheng, Abe Ittycheriah, Mahdis Mahdieh, Mia Chen, Pei Sun, Dustin Tran, Sumit Bagri, Balaji Lakshminarayanan, Jeremiah Liu, Andras Orban, Fabian Gra, Hao Zhou, Xinying Song, Aurelien Boffy, Harish Ganapathy, Steven Zheng, HyunJeong Choe, goston Weisz, Tao Zhu, Yifeng Lu, Siddharth Gopal, Jarrod Kahn, Maciej Kula, Jeff Pitman, Rushin Shah, Emanuel Taropa, Majd Al Merey, Martin Baeuml, Zhifeng Chen, Laurent El Shafey, Yujing Zhang, Olcan Sercinoglu, George Tucker, Enrique Piqueras, Maxim Krikun, Iain Barr, Nikolay Savinov, Ivo Danihelka, Becca Roelofs, Anas White, Anders Andreassen, Tamara von Glehn, Lakshman Yagati, Mehran Kazemi, Lucas Gonzalez, Misha Khalman, Jakub Sygnowski, Alexandre Frechette, Charlotte Smith, Laura Culp, Lev Proleev, Yi Luan, Xi Chen, James Lottes, Nathan Schucher, Federico Lebron, Alban Rustemi, Natalie Clay, Phil Crone, Tomas Kocisky, Jeffrey Zhao, Bartek Perz, Dian Yu, Heidi Howard, Adam Bloniarz, Jack W. Rae, Han Lu, Laurent Sifre, Marcello Maggioni, Fred Alcober, Dan Garrette, Megan Barnes, Shantanu Thakoor, Jacob Austin, Gabriel Barth-Maroon, William Wong, Rishabh Joshi, Rahma Chaabouni, Deeni Fatiha, Arun Ahuja, Gaurav Singh Tomar, Evan Senter, Martin Chadwick, Ilya Kornakov, Nithya Attaluri, Iaki Iturrate, Ruiho Liu, Yunxuan Li, Sarah Cogan, Jeremy Chen, Chao Jia, Chenjie Gu, Qiao Zhang, Jordan Grimstad, Ale Jakse Hartman, Xavier Garcia, Thanumalayan Sankaranarayanan Pillai, Jacob Devlin, Michael Laskin, Diego de Las Casas, Dasha Valter, Connie Tao, Lorenzo Blanco, Adri Puigdomnech Badia, David Reitter, Mianna Chen, Jenny Brennan, Clara Rivera, Sergey Brin, Shariq Iqbal, Gabriela Surita, Jane Labanowski, Abhi Rao, Stephanie Winkler, Emilio Parisotto, Yiming Gu, Kate Olszewska, Ravi Addanki, Antoine Miech, Annie Louis, Denis Teplyashin, Geoff Brown, Elliot Catt, Jan Balaguer, Jackie Xiang, Pidong Wang, Zoe Ashwood, Anton Briukhov, Albert Webson, Sanjay Ganapathy, Smit Sanghavi, Ajay Kannan, Ming-Wei Chang, Axel Stjerngren, Josip Djolonga, Yuting Sun, Ankur Bapna, Matthew Aitchison, Pedram Pejman, Henryk Michalewski, Tianhe Yu, Cindy Wang, Juliette Love, Junwhan Ahn, Dawn Bloxwich, Kehang Han, Peter Humphreys, Thibault Sellam, James Bradbury, Varun Godbole, Sina Samangooei, Bogdan Damoc, Alex Kaskasoli, Sbastien M. R. Arnold, Vijay Vasudevan, Shubham Agrawal, Jason Riesa, Dmitry Lepikhin, Richard Tanburn, Srivatsan Srinivasan, Hyeontaek Lim, Sarah Hodgkinson, Pranav Shyam, Johan Ferret, Steven Hand, Ankush Garg, Tom Le Paine, Jian Li, Yujia Li, Minh Giang, Alexander

Neitz, Zaheer Abbas, Sarah York, Machel Reid, Elizabeth Cole, Aakanksha Chowdhery, Dipanjan Das, Dominika Rogozińska, Vitaliy Nikolaev, Pablo Sprechmann, Zachary Nado, Lukas Zilka, Flavien Prost, Luheng He, Marianne Monteiro, Gaurav Mishra, Chris Welty, Josh Newlan, Dawei Jia, Miltiadis Allamanis, Clara Huiyi Hu, Raoul de Liedekerke, Justin Gilmer, Carl Saroufim, Shruti Rijhwani, Shaobo Hou, Disha Shrivastava, Anirudh Baddepudi, Alex Goldin, Adnan Ozturel, Albin Cassirer, Yunhan Xu, Daniel Sohn, Devendra Sachan, Reinald Kim Amplayo, Craig Swanson, Dessie Petrova, Shashi Narayan, Arthur Guez, Siddhartha Brahma, Jessica Landon, Miteyan Patel, Ruizhe Zhao, Kevin Vilella, Luyu Wang, Wenhao Jia, Matthew Rahtz, Mai Giménez, Legg Yeung, James Keeling, Petko Georgiev, Diana Mincu, Boxi Wu, Salem Haykal, Rachel Saputro, Kiran Vodrahalli, James Qin, Zeynep Cankara, Abhanshu Sharma, Nick Fernando, Will Hawkins, Behnam Neyshabur, Solomon Kim, Adrian Hutter, Priyanka Agrawal, Alex Castro-Ros, George van den Driessche, Tao Wang, Fan Yang, Shuo yiin Chang, Paul Komarek, Ross McIlroy, Mario Lučić, Guodong Zhang, Wael Farhan, Michael Sharman, Paul Natsev, Paul Michel, Yamini Bansal, Siyuan Qiao, Kris Cao, Siamak Shakeri, Christina Butterfield, Justin Chung, Paul Kishan Rubenstein, Shivani Agrawal, Arthur Mensch, Kedar Soparkar, Karel Lenc, Timothy Chung, Aedan Pope, Loren Maggiore, Jackie Kay, Priya Jhakra, Shibo Wang, Joshua Maynez, Mary Phuong, Taylor Tobin, Andrea Tacchetti, Maja Trebacz, Kevin Robinson, Yash Katariya, Sebastian Riedel, Paige Bailey, Kefan Xiao, Nimesh Ghelani, Lora Aroyo, Ambrose Slone, Neil Houlsby, Xuehan Xiong, Zhen Yang, Elena Gribovskaya, Jonas Adler, Mateo Wirth, Lisa Lee, Music Li, Thais Kagohara, Jay Pavagadhi, Sophie Bridgers, Anna Bortsova, Sanjay Ghemawat, Zafarali Ahmed, Tianqi Liu, Richard Powell, Vijay Bolina, Mariko Iinuma, Polina Zablotskaia, James Besley, Da-Woon Chung, Timothy Dozat, Ramona Comanescu, Xiance Si, Jeremy Greer, Guolong Su, Martin Polacek, Raphaël Lopez Kaufman, Simon Tokumine, Hexiang Hu, Elena Buchatskaya, Yingjie Miao, Mohamed Elhawaty, Aditya Siddhant, Nenad Tomašev, Jinwei Xing, Christina Greer, Helen Miller, Shereen Ashraf, Aurko Roy, Zizhao Zhang, Ada Ma, Angelos Filos, Milos Besta, Rory Blevins, Ted Klimenko, Chih-Kuan Yeh, Soravit Changpinyo, Jiaqi Mu, Oscar Chang, Mantas Pajarskas, Carrie Muir, Vered Cohen, Charline Le Lan, Krishna Haridasan, Amit Marathe, Steven Hansen, Sholto Douglas, Rajkumar Samuel, Mingqiu Wang, Sophia Austin, Chang Lan, Jiepu Jiang, Justin Chiu, Jaime Alonso Lorenzo, Lars Lowe Sjöstrand, Sébastien Cevey, Zach Gleicher, Thi Avrahami, Anudhyan Boral, Hansa Srinivasan, Vittorio Selo, Rhys May, Konstantinos Aisopos, Léonard Hussenot, Livio Baldini Soares, Kate Baumli, Michael B. Chang, Adrià Recasens, Ben Caine, Alexander Pritzel, Filip Pavetic, Fabio Pardo, Anita Gergely, Justin Frye, Vinay Ramasesh, Dan Horgan, Kartikeya Badola, Nora Kassner, Subhrajit Roy, Ethan Dyer, Víctor Campos Campos, Alex Tomala, Yunhao Tang, Dalia El Badawy, Elspeth White, Basil Mustafa, Oran Lang, Abhishek Jindal, Sharad Vikram, Zhitao Gong, Sergi Caelles, Ross Hemsley, Gregory Thornton, Fangxiaoyu Feng, Wojciech Stokowiec, Ce Zheng, Phoebe Thacker, Çağlar Ünlü, Zhishuai Zhang, Mohammad Saleh, James Svensson, Max Bileschi, Piyush Patil, Ankesh Anand, Roman Ring, Katerina Tsihlias, Arpi Vezer, Marco Selvi, Toby Shevlane, Mikel Rodriguez, Tom Kwiatkowski, Samira Daruki, Keran Rong, Allan Dafoe, Nicholas FitzGerald, Keren Gu-Lemberg, Mina Khan, Lisa Anne Hendricks, Marie Pellet, Vladimir Feinberg, James Cobon-Kerr, Tara Sainath, Maribeth Rauh, Sayed Hadi Hashemi, Richard Ives, Yana Hasson, Eric Noland, Yuan Cao, Nathan Byrd, Le Hou, Qingze Wang, Thibault Sottiaux, Michela Paganini, Jean-Baptiste Lespiau, Alexandre Moufarek, Samer Hassan, Kaushik Shivakumar, Joost van Amersfoort, Amol Mandhane, Pratik Joshi, Anirudh Goyal, Matthew Tung, Andrew Brock, Hannah Sheahan, Vedant Misra, Cheng Li, Nemanja Rakićević, Mostafa Dehghani, Fangyu Liu, Sid Mittal, Junhyuk Oh, Seb Noury, Eren Sezener, Fantine Huot, Matthew Lamm, Nicola De Cao, Charlie Chen, Sidharth Mudgal, Romina Stella, Kevin Brooks, Gautam Vasudevan, Chenxi Liu, Mainak Chaitin, Nivedita Melinkeri, Aaron Cohen, Venus Wang, Kristie Seymore, Sergey Zubkov, Rahul Goel, Summer Yue, Sai Krishnakumaran, Brian Albert, Nate Hurley, Motoki Sano, Anhad Mohanane, Jonah Joughin, Egor Filonov, Tomasz Kepa, Yomna Eldawy, Jiawern Lim, Rahul Rishi, Shirin Badiezadegan, Taylor Bos, Jerry Chang, Sanil Jain, Sri Gayatri Sundara Padmanabhan, Subha Puttagunta, Kalpesh Krishna, Leslie Baker, Norbert Kalb, Vamsi Bedapudi, Adam Kurzrok, Shuntong Lei, Anthony Yu, Oren Litvin, Xiang Zhou, Zhichun Wu, Sam Sobell, Andrea Sciliano, Alan Papir, Robby Neale, Jonas Bragagnolo, Tej Toor, Tina Chen, Valentin Anklin, Feiran Wang, Richie Feng, Milad Gholami, Kevin Ling, Lijuan Liu, Jules Walter, Hamid Moghaddam, Arun Kishore, Jakub Adamek, Tyler Mercado, Jonathan Mallinson, Siddhinita Wandekar, Stephen Cagle, Eran Ofek, Guillermo Garrido, Clemens Lombriser, Maksim Mukha, Botu Sun, Hafeezul Rahman Mohammad, Josip Matak, Yadi Qian, Vikas Peswani, Pawel Janus, Quan Yuan, Leif Schelin, Oana David, Ankur Garg,

Yifan He, Oleksii Duzhyi, Anton Älgmyr, Timothée Lottaz, Qi Li, Vikas Yadav, Luyao Xu, Alex Chinien, Rakesh Shivanna, Aleksandr Chuklin, Josie Li, Carrie Spadine, Travis Wolfe, Kareem Mohamed, Subhabrata Das, Zihang Dai, Kyle He, Daniel von Dincklage, Shyam Upadhyay, Akanksha Maurya, Luyan Chi, Sebastian Krause, Khalid Salama, Pam G Rabinovitch, Pavan Kumar Reddy M, Aarush Selvan, Mikhail Dektiarev, Golnaz Ghiasi, Erdem Guven, Himanshu Gupta, Boyi Liu, Deepak Sharma, Idan Heimlich Shtacher, Shachi Paul, Oscar Akerlund, François-Xavier Aubet, Terry Huang, Chen Zhu, Eric Zhu, Elico Teixeira, Matthew Fritze, Francesco Bertolini, Liana-Eleonora Marinescu, Martin Bölle, Dominik Paulus, Khyatti Gupta, Tejasi Latkar, Max Chang, Jason Sanders, Roopa Wilson, Xuewei Wu, Yi-Xuan Tan, Lam Nguyen Thiet, Tulsee Doshi, Sid Lall, Swaroop Mishra, Wanming Chen, Thang Luong, Seth Benjamin, Jasmine Lee, Ewa Andrejczuk, Dominik Rabiej, Vipul Ranjan, Krzysztof Styrz, Pengcheng Yin, Jon Simon, Malcolm Rose Harriott, Mudit Bansal, Alexei Robsky, Geoff Bacon, David Greene, Daniil Mirylenka, Chen Zhou, Obaid Sarvana, Abhimanyu Goyal, Samuel Andermatt, Patrick Siegler, Ben Horn, Assaf Israel, Francesco Pongetti, Chih-Wei "Louis" Chen, Marco Selvatici, Pedro Silva, Kathie Wang, Jackson Tolins, Kelvin Guu, Roey Yogeve, Xiaochen Cai, Alessandro Agostini, Maulik Shah, Hung Nguyen, Noah Ó Donnaile, Sébastien Pereira, Linda Friso, Adam Stambler, Adam Kurzrok, Chenkai Kuang, Yan Romanikhin, Mark Geller, ZJ Yan, Kane Jang, Cheng-Chun Lee, Wojciech Fica, Eric Malmi, Qijun Tan, Dan Banica, Daniel Balle, Ryan Pham, Yanping Huang, Diana Avram, Hongzhi Shi, Jasjot Singh, Chris Hidey, Niharika Ahuja, Pranab Saxena, Dan Dooley, Srividya Pranavi Potharaju, Eileen O'Neill, Anand Gokulchandran, Ryan Foley, Kai Zhao, Mike Dusenberry, Yuan Liu, Pulkit Mehta, Ragha Kotikalapudi, Chalence Safranek-Shrader, Andrew Goodman, Joshua Kessinger, Eran Globen, Prateek Kolhar, Chris Gorgolewski, Ali Ibrahim, Yang Song, Ali Eichenbaum, Thomas Brovelli, Sahitya Potluri, Preethi Lahoti, Cip Baetu, Ali Ghorbani, Charles Chen, Andy Crawford, Shalini Pal, Mukund Sridhar, Petru Gurita, Asier Mujika, Igor Petrovski, Pierre-Louis Cedoz, Chenmei Li, Shiyuan Chen, Nicolò Dal Santo, Siddharth Goyal, Jitesh Punjabi, Karthik Kappaganthu, Chester Kwak, Pallavi LV, Sarmishta Velury, Himadri Choudhury, Jamie Hall, Premal Shah, Ricardo Figueira, Matt Thomas, Minjie Lu, Ting Zhou, Chintu Kumar, Thomas Jurdi, Sharat Chikkerur, Yenai Ma, Adams Yu, Soo Kwak, Victor Ahdel, Sujeevan Rajayogam, Travis Choma, Fei Liu, Aditya Barua, Colin Ji, Ji Ho Park, Vincent Hellendoorn, Alex Bailey, Taylan Bilal, Huanjie Zhou, Mehrdad Khatir, Charles Sutton, Wojciech Rzadkowski, Fiona Macintosh, Roopali Vij, Konstantin Shagin, Paul Medina, Chen Liang, Jinjing Zhou, Pararth Shah, Yingying Bi, Attila Dankovics, Shipra Banga, Sabine Lehmann, Marissa Bredesen, Zifan Lin, John Eric Hoffmann, Jonathan Lai, Raynald Chung, Kai Yang, Nihal Balani, Arthur Bražinskas, Andrei Sozanschi, Matthew Hayes, Héctor Fernández Alcalde, Peter Makarov, Will Chen, Antonio Stella, Liselotte Snijders, Michael Mandl, Ante Kärrman, Paweł Nowak, Xinyi Wu, Alex Dyck, Krishnan Vaidyanathan, Raghavender R, Jessica Mallet, Mitch Rudominer, Eric Johnston, Sushil Mittal, Akhil Udathu, Janara Christensen, Vishal Verma, Zach Irving, Andreas Santucci, Gamaleldin Elsayed, Elnaz Davoodi, Marin Georgiev, Ian Tenney, Nan Hua, Geoffrey Cideron, Edouard Leurent, Mahmoud Alnahlawi, Ionut Georgescu, Nan Wei, Ivy Zheng, Dylan Scandinaro, Heinrich Jiang, Jasper Snoek, Mukund Sundararajan, Xuezhi Wang, Zack Ontiveros, Itay Karo, Jeremy Cole, Vinu Rajashekhar, Lara Tume, Eyal Ben-David, Rishub Jain, Jonathan Uesato, Romina Datta, Oskar Bunyan, Shimu Wu, John Zhang, Piotr Stanczyk, Ye Zhang, David Steiner, Subhajit Naskar, Michael Azzam, Matthew Johnson, Adam Paszke, Chung-Cheng Chiu, Jaume Sanchez Elias, Afroz Mohiuddin, Faizan Muhammad, Jin Miao, Andrew Lee, Nino Vieillard, Jane Park, Jiageng Zhang, Jeff Stanway, Drew Garmon, Abhijit Karmarkar, Zhe Dong, Jong Lee, Aviral Kumar, Luowei Zhou, Jonathan Evens, William Isaac, Geoffrey Irving, Edward Loper, Michael Fink, Isha Arkatkar, Nanxin Chen, Izhak Shafran, Ivan Petrychenko, Zhe Chen, Johnson Jia, Anselm Levskaya, Zhenkai Zhu, Peter Grabowski, Yu Mao, Alberto Magni, Kaisheng Yao, Javier Snider, Norman Casagrande, Evan Palmer, Paul Suganthan, Alfonso Castaño, Irene Giannoumis, Wooyeol Kim, Mikołaj Rybiński, Ashwin Sreevatsa, Jennifer Prendki, David Soergel, Adrian Goedeckemeyer, Willi Gierke, Mohsen Jafari, Meenu Gaba, Jeremy Wiesner, Diana Gage Wright, Yawen Wei, Harsha Vashisht, Yana Kulizhskaya, Jay Hoover, Maigo Le, Lu Li, Chimezie Iwuanyanwu, Lu Liu, Kevin Ramirez, Andrey Khorlin, Albert Cui, Tian LIN, Marcus Wu, Ricardo Aguilar, Keith Pallo, Abhishek Chakladar, Ginger Perng, Elena Allica Abellan, Mingyang Zhang, Ishita Dasgupta, Nate Kushman, Ivo Penchev, Alena Repina, Xihui Wu, Tom van der Weide, Priya Ponnappalli, Caroline Kaplan, Jiri Simsa, Shuangfeng Li, Olivier Dousse, Fan Yang, Jeff Piper, Nathan Ie, Rama Pasumarthi, Nathan Lintz, Anitha Vijayakumar, Daniel Andor, Pedro Valenzuela, Minnie Lui, Cosmin Paduraru, Daiyi Peng, Katherine Lee, Shuyuan Zhang, Somer Greene, Duc Dung Nguyen,

Paula Kurylowicz, Cassidy Hardin, Lucas Dixon, Lili Janzer, Kiam Choo, Ziqiang Feng, Biao Zhang, Achintya Singhal, Dayou Du, Dan McKinnon, Natasha Antropova, Tolga Bolukbasi, Orgad Keller, David Reid, Daniel Finchelstein, Maria Abi Raad, Remi Crocker, Peter Hawkins, Robert Dadashi, Colin Gaffney, Ken Franko, Anna Bulanova, Rémi Leblond, Shirley Chung, Harry Askham, Luis C. Cobo, Kelvin Xu, Felix Fischer, Jun Xu, Christina Sorokin, Chris Alberti, Chu-Cheng Lin, Colin Evans, Alek Dimitriev, Hannah Forbes, Dylan Banarse, Zora Tung, Mark Omernick, Colton Bishop, Rachel Sterneck, Rohan Jain, Jiawei Xia, Ehsan Amid, Francesco Piccinno, Xingyu Wang, Praseem Banzal, Daniel J. Mankowitz, Alex Polozov, Victoria Krakovna, Sasha Brown, MohammadHossein Bateni, Dennis Duan, Vlad Firoiu, Meghana Thotakuri, Tom Natan, Matthieu Geist, Ser tan Girgin, Hui Li, Jiayu Ye, Ofir Roval, Reiko Tojo, Michael Kwong, James Lee-Thorp, Christopher Yew, Danila Sinopalnikov, Sabela Ramos, John Mellor, Abhishek Sharma, Kathy Wu, David Miller, Nicolas Sonnerat, Denis Vnukov, Rory Greig, Jennifer Beattie, Emily Caveness, Libin Bai, Julian Eisenschlos, Alex Korchemniy, Tomy Tsai, Mimi Jasarevic, Weize Kong, Phuong Dao, Zeyu Zheng, Frederick Liu, Fan Yang, Rui Zhu, Tian Huey Teh, Jason Sanmiya, Evgeny Gladchenko, Nejc Trdin, Daniel Toyama, Evan Rosen, Sasan Tavakkol, Linting Xue, Chen Elkind, Oliver Woodman, John Carpenter, George Papamakarios, Rupert Kemp, Sushant Kafle, Tanya Grunina, Rishika Sinha, Alice Talbert, Diane Wu, Denese Owusu-Afriyie, Cosmo Du, Chloe Thornton, Jordi Pont-Tuset, Pradyumna Narayana, Jing Li, Saaber Fatehi, John Wieting, Omar Ajmeri, Benigno Uria, Yeongil Ko, Laura Knight, Amélie Hélio, Ning Niu, Shane Gu, Chenxi Pang, Yeqing Li, Nir Levine, Ariel Stolovich, Rebeca Santamaria-Fernandez, Sonam Goenka, Wenny Yustalim, Robin Strudel, Ali Elqursh, Charlie Deck, Hyo Lee, Zonglin Li, Kyle Levin, Raphael Hoffmann, Dan Holtmann-Rice, Olivier Bachem, Sho Arora, Christy Koh, Soheil Hassas Yeganeh, Siim Pöder, Mukarram Tariq, Yanhua Sun, Lucian Ionita, Mojtaba Seyedhosseini, Pouya Tafti, Zhiyu Liu, Anmol Gulati, Jasmine Liu, Xinyu Ye, Bart Chrzaszcz, Lily Wang, Nikhil Sethi, Tianrun Li, Ben Brown, Shreya Singh, Wei Fan, Aaron Parisi, Joe Stanton, Vinod Koverkathu, Christopher A. Choquette-Choo, Yunjie Li, TJ Lu, Abe Ittycheriah, Prakash Shroff, Mani Varadarajan, Sanaz Bahargam, Rob Willoughby, David Gaddy, Guillaume Desjardins, Marco Cornero, Brona Robenek, Bhavishya Mittal, Ben Albrecht, Ashish Shenoy, Fedor Moiseev, Henrik Jacobsson, Alireza Ghaffarkhah, Morgane Riviére, Alanna Walton, Clément Crepy, Alicia Parrish, Zongwei Zhou, Clement Farabet, Carey Radebaugh, Praveen Srinivasan, Claudia van der Salm, Andreas Fjeldland, Salvatore Scellato, Eri Latorre-Chimoto, Hanna Klimczak-Plucińska, David Bridson, Dario de Cesare, Tom Hudson, Piermaria Mendolichio, Lexi Walker, Alex Morris, Matthew Mauger, Alexey Guseynov, Alison Reid, Seth Odoom, Lucia Loher, Victor Cotruta, Madhavi Yenugula, Dominik Grewe, Anastasia Petrushkina, Tom Duerig, Antonio Sanchez, Steve Yadlowsky, Amy Shen, Amir Globerson, Lynette Webb, Sahil Dua, Dong Li, Surya Bhupatiraju, Dan Hurt, Haroon Qureshi, Ananth Agarwal, Tomer Shani, Matan Eyal, Anuj Khare, Shreyas Rammohan Belle, Lei Wang, Chetan Tekur, Mihir Sanjay Kale, Jinliang Wei, Ruoxin Sang, Brennan Saeta, Tyler Liechty, Yi Sun, Yao Zhao, Stephan Lee, Pandu Nayak, Doug Fritz, Manish Reddy Vuyyuru, John Aslanides, Nidhi Vyas, Martin Wicke, Xiao Ma, Evgenii Eltyshev, Nina Martin, Hardie Cate, James Manyika, Keyvan Amiri, Yelin Kim, Xi Xiong, Kai Kang, Florian Luisier, Nilesh Tripuraneni, David Madras, Mandy Guo, Austin Waters, Oliver Wang, Joshua Ainslie, Jason Baldridge, Han Zhang, Garima Pruthi, Jakob Bauer, Feng Yang, Riham Mansour, Jason Gelman, Yang Xu, George Polovets, Ji Liu, Honglong Cai, Warren Chen, XiangHai Sheng, Emily Xue, Sherjil Ozair, Christof Angermueller, Xiaowei Li, Anoop Sinha, Weiren Wang, Julia Wiesinger, Emmanouil Koukoumidis, Yuan Tian, Anand Iyer, Madhu Gurumurthy, Mark Goldenson, Parashar Shah, MK Blake, Hongkun Yu, Anthony Urbanowicz, Jennimaria Palomaki, Chrisantha Fernando, Ken Durden, Harsh Mehta, Nikola Momchev, Elahe Rahimtoroghi, Maria Georgaki, Amit Raul, Sebastian Ruder, Morgan Redshaw, Jinhyuk Lee, Denny Zhou, Komal Jalan, Dinghua Li, Blake Hechtman, Parker Schuh, Milad Nasr, Kieran Milan, Vladimir Mikulik, Juliana Franco, Tim Green, Nam Nguyen, Joe Kelley, Aroma Mahendru, Andrea Hu, Joshua Howland, Ben Vargas, Jeffrey Hui, Kshitij Bansal, Vikram Rao, Rakesh Ghiya, Emma Wang, Ke Ye, Jean Michel Sarr, Melanie Moranski Preston, Madeleine Elish, Steve Li, Aakash Kaku, Jigar Gupta, Ice Pasupat, Da-Cheng Juan, Milan Someswar, Tejvi M., Xinyun Chen, Aida Amini, Alex Fabrikant, Eric Chu, Xuanyi Dong, Amruta Muthal, Senaka Buthpitiya, Sarthak Jauhari, Nan Hua, Urvashi Khandelwal, Ayal Hitron, Jie Ren, Larissa Rinaldi, Shahar Drath, Avigail Dabush, Nan-Jiang Jiang, Harshal Godhia, Uli Sachs, Anthony Chen, Yicheng Fan, Hagai Taitelbaum, Hila Noga, Zhuyun Dai, James Wang, Chen Liang, Jenny Hamer, Chun-Sung Ferng, Chenel Elkind, Aviel Atias, Paulina Lee, Vít Listík, Mathias Carlen, Jan van de Kerkhof, Marcin Pikus, Krunoslav Zaher, Paul Müller, Sasha

Zykova, Richard Stefanec, Vitaly Gatsko, Christoph Hirsenschall, Ashwin Sethi, Xingyu Federico Xu, Chetan Ahuja, Beth Tsai, Anca Stefanoiu, Bo Feng, Keshav Dhandhanania, Manish Katyal, Akshay Gupta, Atharva Parulekar, Divya Pitta, Jing Zhao, Vivaan Bhatia, Yashodha Bhavnani, Omar Alhadlaq, Xiaolin Li, Peter Danenberg, Dennis Tu, Alex Pine, Vera Filippova, Abhipso Ghosh, Ben Limonchik, Bhargava Urala, Chaitanya Krishna Lanka, Derik Clive, Yi Sun, Edward Li, Hao Wu, Kevin Hongtongsak, Ianna Li, Kalind Thakkar, Kuanysh Omarov, Kushal Majmundar, Michael Alverson, Michael Kucharski, Mohak Patel, Mudit Jain, Maksim Zabelin, Paolo Pelagatti, Rohan Kohli, Saurabh Kumar, Joseph Kim, Swetha Sankar, Vineet Shah, Lakshmi Ramachandruni, Xiangkai Zeng, Ben Bariach, Laura Weidinger, Tu Vu, Alek Andreev, Antoine He, Kevin Hui, Sheleem Kashem, Amar Subramanya, Sissie Hsiao, Demis Hassabis, Koray Kavukcuoglu, Adam Sadovsky, Quoc Le, Trevor Strohman, Yonghui Wu, Slav Petrov, Jeffrey Dean, and Oriol Vinyals. Gemini: A family of highly capable multimodal models, 2023. URL <http://arxiv.org/abs/2312.11805v5>.

Peng Xia, Siwei Han, Shi Qiu, Yiyang Zhou, Zhaoyang Wang, Wenhao Zheng, Zhaorun Chen, Chenhang Cui, Mingyu Ding, Linjie Li, Lijuan Wang, and Huaxiu Yao. Mmie: Massive multimodal interleaved comprehension benchmark for large vision-language models, 2024. URL <http://arxiv.org/abs/2410.10139v2>.

Michal Yarom, Yonatan Bitton, Soravit Changpinyo, Roei Aharoni, Jonathan Herzig, Oran Lang, Eran Ofek, and Idan Szpektor. What you see is what you read? improving text-image alignment evaluation, 2023. URL <http://arxiv.org/abs/2305.10400v4>.

Jiahui Yu, Yuanzhong Xu, Jing Yu Koh, Thang Luong, Gunjan Baid, Zirui Wang, Vijay Vasudevan, Alexander Ku, Yinfei Yang, Burcu Karagol Ayan, Ben Hutchinson, Wei Han, Zarana Parekh, Xin Li, Han Zhang, Jason Baldridge, and Yonghui Wu. Scaling autoregressive models for content-rich text-to-image generation, 2022. URL <http://arxiv.org/abs/2206.10789v1>.
