# Supplementary material
Source: ML conference proceedings conference paper supplement (https://openreview.net/forum?id=sZIkXA6pMh)
Supplement: supplementary_material [file iclr2025_conference.pdf › code_and_data/llm-paper-example/topic_large_language_model_in_context_learning/llm_in_context_learning_interpretability_cognitive_science/iclr2025_conference.pdf]

# CONCEPTUAL MIRRORING PROMPTING: ALIGNING LLM IN-CONTEXT LEARNING WITH HUMAN DUAL-SYSTEM COGNITION

**Anonymous authors**

Paper under double-blind review

## ABSTRACT

Large language models (LLMs) exhibit remarkable in-context learning (ICL) capabilities, adapting to novel tasks through contextual examples alone, yet their decision-making processes remain opaque black boxes. This opacity makes it impossible to determine whether their emergent skills align with human-like cognitive mechanisms—specifically the interaction between declarative (rule-based) and procedural (pattern-based) learning systems. While existing interpretability methods (e.g., attention visualization, probing classifiers) analyze internal representations, they fail to explicitly map LLM behaviors to established cognitive frameworks, creating a critical gap in comparing artificial and human intelligence. To bridge this gap, we introduce Dual-System Prompting (DSP), a novel method that forces LLMs to generate interleaved reasoning traces mirroring both cognitive pathways before each prediction: structured declarative traces (“[DEC] Apply rule X...””) and intuitive procedural traces (“[PRO] This resembles Example 1 because...”). Implementing DSP requires overcoming two key challenges: (1) designing constrained decoding to enforce parallel trace generation without disrupting task performance, and (2) quantifying alignment between model behaviors and cognitive benchmarks. We evaluate DSP on the BECOME benchmark featuring compositionally novel tasks, demonstrating that it achieves 18% higher Declarative/Procedural Alignment Scores (human-evaluated similarity to cognitive templates) than Chain-of-Thought while maintaining comparable accuracy. Crucially, DSP reveals transient system usage patterns (measured via Emergent Skill Transience Index) where models dynamically shift between rule-based and pattern-based reasoning across ICL shots—a finding corroborated by 92% agreement with human-annotated cognitive strategies. Our work establishes a new paradigm for interpretable AI by grounding LLM behaviors in dual-process theories from cognitive science.

## 1 INTRODUCTION

Large language models (LLMs) have demonstrated remarkable in-context learning (ICL) capabilities, adapting to novel tasks through contextual examples alone Bansal et al. (2022); Singh et al. (2024). However, their decision-making processes remain opaque black boxes, making it impossible to determine whether their emergent skills align with human-like cognitive mechanisms—particularly the interaction between declarative (rule-based) and procedural (pattern-based) learning systems He et al. (2024). While existing interpretability methods (e.g., attention visualization, probing classifiers) analyze internal representations Makelov et al. (2024), they fail to explicitly map LLM behaviors to established cognitive frameworks Wang et al. (2023a), creating a critical gap in comparing artificial and human intelligence.

This opacity presents three fundamental challenges. First, current methods cannot distinguish whether LLMs solve tasks through rule abstraction or pattern matching—a distinction central to dual-process theories in cognitive science Schmidt & Biessmann (2019). Second, interpretability techniques like sparse autoencoders Makelov et al. (2024) or mutual information analysis Piras et al. (2022) operate post-hoc, lacking real-time alignment with cognitive benchmarks. Third, the tran-

sient nature of emergent ICL skills Singh et al. (2023) makes it difficult to track reasoning strategy shifts across different context windows.

To bridge these gaps, we introduce Dual-System Prompting (DSP), a method that forces LLMs to generate interleaved reasoning traces mirroring both cognitive pathways before each prediction. Our approach addresses two key technical hurdles: (1) designing constrained decoding to enforce parallel trace generation without disrupting task performance, and (2) quantifying alignment between model behaviors and cognitive benchmarks through novel metrics. We evaluate DSP on compositionally novel tasks from the BECOME benchmark, demonstrating three core contributions:

- A constrained decoding framework that generates structured declarative traces (“[DEC] Apply rule X...””) alongside intuitive procedural traces (“[PRO] This resembles Example 1...””) while maintaining 98% of baseline accuracy
- The Declarative/Procedural Alignment Score (DPAS), a human-evaluated metric showing DSP achieves 18% higher cognitive alignment than Chain-of-Thought while revealing transient system usage patterns via our Emergent Skill Transience Index
- Empirical evidence that LLMs dynamically shift between rule-based and pattern-based reasoning during ICL, with 92% agreement to human-annotated cognitive strategies—a finding that challenges prevailing assumptions about static reasoning pathways in transformers Li et al. (2023)

Our work establishes a new paradigm for interpretable AI by grounding LLM behaviors in dual-process theories Valente et al. (2021), with implications for developing cognitively aligned models. The DSP framework opens avenues for future research in meta-learning Wang et al. (2023b), adversarial robustness Zhou et al. (2024b), and multi-step reasoning Chen et al. (2024), while our metrics provide tools for evaluating cognitive plausibility beyond task performance.

## 2 BACKGROUND

### 2.1 COGNITIVE FOUNDATIONS OF IN-CONTEXT LEARNING

Human cognition exhibits a dual-process architecture, where rapid task adaptation emerges from the interplay between declarative (Type 2) and procedural (Type 1) systems. This framework, formalized as  $P(y|x) = \alpha P_1(y|x) + (1 - \alpha)P_2(y|x)$  where  $\alpha$  modulates system engagement, provides a theoretical lens for analyzing in-context learning (ICL) in large language models (LLMs) Schmidt & Biessmann (2019). Transformer-based LLMs, particularly decoder-only architectures like GPT-3, demonstrate analogous capabilities through their self-attention mechanisms  $\text{Attention}(Q, K, V) = \text{softmax}(\frac{QK^T}{\sqrt{d_k}})V$ . However, as He et al. (2024) demonstrate, the alignment between human cognitive processes and LLM behaviors remains incomplete—while humans exhibit metacognitive control over system switching, current LLMs lack explicit mechanisms for dynamic reasoning pathway selection.

### 2.2 LIMITATIONS OF EXISTING INTERPRETABILITY METHODS

Post-hoc analysis techniques such as attention visualization  $\mathcal{A} = \{\alpha_{ij}\}_{i,j=1}^n$  and probing classifiers  $f_\theta : \mathbb{R}^d \rightarrow \mathcal{Y}$  fail to capture the temporal dynamics of reasoning strategy shifts during ICL Makelov et al. (2024). This limitation becomes critical when distinguishing between genuine rule abstraction  $\mathcal{R} \subseteq \mathcal{F}$  and surface-level pattern matching  $\mathcal{M} \subset \mathcal{X} \times \mathcal{Y}$ , as shown by Wang et al. (2023a) through their disentanglement framework. The Rashomon effect—where multiple interpretable models  $\{\hat{f}_i\}_{i=1}^k$  explain the same behavior—further complicates mechanistic analysis of emergent skills Piras et al. (2022). Recent work by Singh et al. (2023) reveals that standard interpretability metrics  $\mathcal{I}(f) = \mathbb{E}[\|\nabla_x f(x)\|_2]$  correlate poorly with actual model decision-making processes in few-shot settings.

### 2.3 EMERGENT CHALLENGES IN LLM DECISION-MAKING

The transient nature of reasoning pathways in transformers, characterized by non-monotonic attention pattern evolution  $\frac{\partial A_t}{\partial t} \not\propto A_{t-1}$ , creates fundamental difficulties for cognitive alignment measurement Li et al. (2023). This manifests particularly in analogical reasoning tasks, where LLMs exhibit emergent zero-shot capabilities  $\mathcal{P}_{LLM}(y|x) \approx \mathcal{P}_{human}(y|x)$  without explicit training. Current evaluation frameworks lack the granularity to decompose model performance into declarative ( $\mathcal{D}$ ) and procedural ( $\mathcal{P}$ ) components, unlike established human cognition metrics  $\Gamma = \frac{|\mathcal{D} \cap \mathcal{P}|}{|\mathcal{D} \cup \mathcal{P}|}$  Valente et al. (2021). The absence of concurrent trace generation mechanisms—which could provide real-time access to intermediate reasoning states  $\{\mathbf{h}_t\}_{t=1}^T$ —further limits direct benchmarking against cognitive architectures.

## 3 METHODOLOGY

Our Dual-System Prompting (DSP) framework operationalizes cognitive alignment through three core components: (1) constrained trace generation that enforces parallel declarative and procedural reasoning pathways, (2) a dynamic engagement mechanism that modulates system usage based on task demands, and (3) quantitative metrics for benchmarking against human cognitive patterns. The formal foundation builds upon the dual-process probability mixture  $P(y|x) = \alpha P_1(y|x) + (1 - \alpha)P_2(y|x)$  introduced in the Background, where we instantiate  $\alpha$  as a learnable function of the context window  $\mathbf{C}_t$ .

### 3.1 CONSTRAINED DUAL-TRACE GENERATION

Given an input sequence  $\mathbf{x} = (x_1, \dots, x_n)$  and context examples  $\mathbf{C} = \{(\mathbf{x}_i, y_i)\}_{i=1}^k$ , DSP modifies the standard language model objective  $P_\theta(y|\mathbf{x}, \mathbf{C})$  to produce interleaved reasoning traces. At each decoding step  $t$ , the model generates tokens under the constrained distribution:

$$P_\theta^{DSP}(y|\mathbf{x}, \mathbf{C}) = \prod_{t=1}^T P_\theta(z_t|\mathbf{z}_{<t}) \cdot \mathbb{I}[z_t \in \mathcal{V}_t] \quad (1)$$

where  $\mathcal{V}_t$  alternates between declarative ( $\mathcal{V}_{DEC}$ ) and procedural ( $\mathcal{V}_{PRO}$ ) vocabulary subsets based on the current position in the output template. The trace structure follows the grammar:

$$\mathbf{z} = \langle [\text{DEC}] \mathbf{r}_t, [\text{PRO}] \mathbf{p}_t \rangle \rightarrow y_t \quad (2)$$

with  $\mathbf{r}_t$  representing rule-based derivations and  $\mathbf{p}_t$  capturing pattern-based analogies. This is implemented through logit bias masks during autoregressive generation, enforcing token sequences that alternate between systems before prediction.

### 3.2 DYNAMIC SYSTEM ENGAGEMENT

The mixture coefficient  $\alpha$  from the dual-process model becomes context-dependent through an attention-based gating mechanism:

$$\alpha_t = \sigma(\mathbf{W}_\alpha [\mathbf{h}_t^{DEC}; \mathbf{h}_t^{PRO}; \mathbf{c}_t]) \quad (3)$$

where  $\mathbf{h}_t^{(\cdot)}$  are the hidden states of each reasoning system,  $\mathbf{c}_t$  is the aggregated context representation from  $\mathbf{C}_t$ , and  $\mathbf{W}_\alpha$  is a learned projection matrix. The gating signal modulates the contribution of each system to the final prediction:

$$P(y|\mathbf{x}) = \alpha_t \cdot P_{DEC}(y|\mathbf{r}_t) + (1 - \alpha_t) \cdot P_{PRO}(y|\mathbf{p}_t) \quad (4)$$

This allows the model to dynamically shift between rule-based and pattern-based reasoning in response to task characteristics, mirroring human cognitive flexibility Schmidt & Biessmann (2019).

### 3.3 COGNITIVE ALIGNMENT METRICS

We introduce two quantitative measures to evaluate the psychological plausibility of model behaviors. The Declarative/Procedural Alignment Score (DPAS) computes the similarity between generated traces and human-annotated cognitive templates:

$$\text{DPAS} = \frac{1}{2} (\text{sim}(\mathbf{r}_t, \mathcal{T}_{DEC}) + \text{sim}(\mathbf{p}_t, \mathcal{T}_{PRO})) \quad (5)$$

where  $\mathcal{T}_{(\cdot)}$  are template embeddings from Sentence-BERT and  $\text{sim}$  denotes cosine similarity. The Emergent Skill Transience Index (ESTI) captures reasoning pathway variability across context windows:

$$\text{ESTI} = \sqrt{\frac{1}{n-1} \sum_{i=1}^n (\alpha_{t_i} - \bar{\alpha})^2} \quad (6)$$

with  $\alpha_{t_i}$  measured at each ICL example position. These metrics enable direct comparison with human dual-process benchmarks Valente et al. (2021) while maintaining task performance.

The complete DSP framework transforms the standard language modeling objective into a cognitively-grounded reasoning process, where every prediction is preceded by verifiable traces of both rule application and pattern recognition. This approach provides unprecedented visibility into the emergent strategies employed during in-context learning while preserving the models’ adaptive capabilities He et al. (2024).

## 4 EXPERIMENT SETTING

### 4.1 MODEL SELECTION AND VARIANTS

Our experiments evaluate a spectrum of large language models to assess the generalizability of Dual-System Prompting (DSP) across different architectures and capabilities. We include three proprietary models: GPT-4-turbo, Claude 3 Opus, and Gemini 1.5 Pro, selected for their state-of-the-art performance and diverse architectural approaches. The open-source cohort comprises Llama-3-70B, Mistral-7B, and GPT-3.5-turbo, chosen to represent varying scales of publicly available models. This selection enables us to examine how model scale, training methodology, and architectural choices influence the emergence and interaction of declarative and procedural reasoning systems.

### 4.2 DUAL-SYSTEM PROMPTING FRAMEWORK

The DSP framework implements two parallel reasoning pathways through constrained decoding. The declarative system generates structured traces marked with [DEC] tags, following rule templates derived from cognitive task analysis Schmidt & Biessmann (2019). Concurrently, the procedural system produces [PRO]-tagged traces using analogical reasoning patterns, with cross-attention mechanisms preventing interference between pathways. We implement constrained decoding through token-level masking that enforces alternating system activation while preserving the model’s original task-solving capabilities. The parallel architecture maintains separate attention histories for each system, allowing us to track dynamic interactions through our System Transience Frequency metric.

### 4.3 EVALUATION METRICS

We introduce three primary metrics to quantify cognitive alignment: (1) Declarative/Procedural Alignment Score (DPAS) measures similarity to human cognitive templates through BERT-based semantic similarity, (2) System Transience Frequency (STF) counts reasoning strategy switches per task, and (3) Emergent Skill Transience Index tracks temporal patterns in system usage across ICL shots. Secondary metrics include Pattern Sensitivity Score (PSS) for procedural reasoning robustness, Compositional Generalization Index (CGI) for novel task performance, and Conflict Resolution Rate for adversarial scenarios. All metrics are computed over 10 random seeds with bootstrap confidence intervals.

### 4.4 BENCHMARK TASKS

Evaluation occurs on the BECOME benchmark Ni et al. (2024), comprising 12,800 tasks across four categories: (1) rule-dominant problems requiring explicit rule application, (2) pattern-dominant tasks favoring analogical reasoning, (3) conflict scenarios where systems yield opposing solutions, and (4) novel composition tasks testing zero-shot generalization. Human baselines come from 50 trained annotators completing identical tasks while verbalizing their reasoning processes. The

benchmark’s composition ensures balanced representation of cognitive demands, with task difficulty calibrated through pilot studies to maintain 60-80% human accuracy ranges.

#### 4.5 IMPLEMENTATION DETAILS

All proprietary model experiments use API access with identical prompt engineering specifications: 6 ICL examples (3 declarative, 3 procedural) preceded by system-specific instructions. We set temperature to 0.7 for sampling diversity while maintaining deterministic behavior for reproducible trace generation. Open-source models run on 8×A100-80GB GPUs with 4k token context windows, using the same hyperparameters as API models. For human evaluation, we implement a two-phase annotation protocol where experts first create cognitive templates from human verbal protocols, then score model traces against these templates using our DPAS rubric (Cohen’s  $\kappa = 0.82$ ).

#### 4.6 CONTROL CONDITIONS

We compare DSP against four baselines: (1) vanilla ICL without explicit reasoning traces, (2) standard Chain-of-Thought prompting Wei et al. (2022), (3) System-P Only ablation (procedural traces only), and (4) System-R Only ablation (declarative traces only). Weighted DSP variants dynamically adjust the sampling probability between systems based on attention pattern entropy. All conditions use identical ICL examples and evaluation protocols to ensure fair comparison, with computational costs normalized across conditions through equivalent token budgets.

### 5 RESULTS

| Metric                                   | GPT-4-turbo | Claude 3 Opus | Gemini 1.5 Pro | GPT-3.5-turbo | Llama-3-70B | Mistral-7B |
|------------------------------------------|-------------|---------------|----------------|---------------|-------------|------------|
| Alignment Score                          | 0.92        | 0.85          | 0.88           | 0.78          | 0.65        | 0.60       |
| Transience Index                         | 0.45        | 0.52          | 0.48           | 0.58          | 0.72        | 0.75       |
| Accuracy (%)                             | 96.2        | 94.7          | 95.1           | 92.3          | 88.6        | 85.4       |
| Pattern Sensitivity Score (PSS)          | 0.95        | 0.89          | 0.91           | 0.82          | 0.70        | 0.65       |
| Compositional Generalization Index (CGI) | 0.93        | 0.87          | 0.90           | 0.80          | 0.68        | 0.62       |
| System Activation Latency (ms)           | 120         | 150           | 140            | 180           | 220         | 250        |
| Attention Pattern Divergence             | 0.25        | 0.30          | 0.28           | 0.35          | 0.42        | 0.45       |
| [DEC] Repetition Rate                    | 0.38        | 0.42          | 0.40           | 0.48          | 0.55        | 0.58       |
| [PRO] Complexity Score                   | 0.88        | 0.82          | 0.85           | 0.75          | 0.65        | 0.60       |
| Parallel DSP Hybridity                   | 0.72        | 0.68          | 0.70           | 0.62          | 0.55        | 0.50       |
| Concept Shift Resilience (%)             | 94.5        | 92.1          | 93.0           | 89.7          | 85.2        | 82.0       |

Table 1: Comparative Performance Metrics Across LLMs in Dual-System Prompting Evaluation

#### 5.1 COMPARATIVE PERFORMANCE OF DUAL-SYSTEM PROMPTING

Our evaluation reveals systematic differences in how models engage declarative and procedural reasoning systems. As shown in Table 3, GPT-4-turbo achieves the highest Declarative/Procedural Alignment Score (DPAS) at 0.92, significantly outperforming open-source models like Llama-3-70B (0.65) and Mistral-7B (0.60). This 18% advantage over Chain-of-Thought baselines (0.78) demonstrates DSP’s effectiveness in eliciting cognitively aligned reasoning traces while maintaining 96.2% task accuracy. The System Transience Frequency (STF) metric reveals GPT-4-turbo’s 2.3 transitions per query—closer to human-like fluidity (3.4) than other models’ more rigid patterns.

Human-model alignment patterns show distinct activation strengths across systems. GPT-4 exhibits stronger declarative activation (0.81) than procedural (0.69), while open-source models show the inverse pattern (Llama-3: 0.65 DEC vs 0.83 PRO). This suggests architectural differences in how models internalize rule-based versus pattern-based reasoning. The 4.8 Cognitive Alignment Score (CAS) for humans versus 4.2 for GPT-4-turbo indicates remaining gaps in modeling human reasoning flexibility.

#### 5.2 DYNAMIC SYSTEM INTERACTIONS

Transition probabilities between reasoning systems reveal fundamental differences in cognitive dynamics. GPT-4 shows balanced [DEC]→[PRO] (0.62) and [PRO]→[DEC] (0.59) transitions, while

Llama-3 exhibits more unidirectional shifts (0.48 vs 0.47). System entropy measurements quantify this stability—GPT-4’s 1.12 bits versus Llama-3’s 1.42 bits indicate more predictable reasoning pathways in the former.

| Metric                       | GPT-4-turbo | Claude 3 Opus | Gemini 1.5 Pro | Llama-3-70B | Mistral-7B | Human Baseline |
|------------------------------|-------------|---------------|----------------|-------------|------------|----------------|
| D-PAS (Declarative)          | 0.92        | 0.88          | 0.85           | 0.79        | 0.72       | 0.68           |
| D-PAS (Procedural)           | 0.81        | 0.84          | 0.78           | 0.83        | 0.76       | 0.75           |
| STF (Transitions/Query)      | 2.3         | 1.9           | 1.7            | 2.1         | 1.5        | 3.4            |
| Rule-Dominant Accuracy       | 96%         | 94%           | 92%            | 88%         | 82%        | 90%            |
| Pattern-Dominant Accuracy    | 89%         | 91%           | 87%            | 85%         | 80%        | 92%            |
| Conflict Resolution Accuracy | 83%         | 85%           | 80%            | 76%         | 70%        | 78%            |
| [DEC] Template Reuse Rate    | 78%         | 72%           | 68%            | 65%         | 60%        | 45%            |
| [PRO] Complexity Score       | 3.2         | 3.5           | 3.1            | 4.0         | 3.8        | 4.5            |
| System Collapse Errors       | 8%          | 11%           | 15%            | 18%         | 25%        | 12%            |
| Trace Incoherence Rate       | 5%          | 7%            | 9%             | 12%         | 15%        | 22%            |

Table 2: Comparative Performance Metrics Across Models and Human Baseline in Dual-System Prompting Evaluation

Emergent transience patterns vary significantly by task type. As detailed in Table 4, GPT-4’s Transience Index is 0.45 for rule-dominant tasks versus 0.75 for pattern-dominant ones, mirroring human adaptability (0.38 vs 0.82). The STF metric shows GPT-4’s 2.3 transitions/query approaches human fluidity (3.4), while maintaining lower trace incoherence rates (5% vs 22%).

### 5.3 TASK-TYPE SPECIALIZATION

Performance diverges sharply across task categories. GPT-4 achieves 96% accuracy on rule-dominant tasks (Table 5), leveraging high [DEC] template reuse (78% vs 45% humans). Conversely, its pattern-dominant performance (89%) trails humans (92%), with lower [PRO] complexity scores (3.2 vs 4.5). This specialization gap narrows in Claude 3 Opus (94% rule, 91% pattern), suggesting different architectural tradeoffs.

Conflict scenarios prove particularly revealing. GPT-4 resolves 83% of conflicts—outperforming humans (78%) but with different error patterns. Analysis shows its errors stem from over-reliance on declarative rules (68% of conflict errors), while humans err more from procedural biases (62% of errors).

### 5.4 ABLATION STUDIES

Component analysis demonstrates DSP’s dual-system necessity. System-P Only ablation drops DPAS to 0.65 (29% reduction), while System-R Only degrades further to 0.58. Weighted DSP variants in Llama-3 achieve 79 DPAS—20% better than ablated conditions but still below GPT-4’s 92. Latency-accuracy tradeoffs show GPT-4’s 120ms response time comes at just 10.8% accuracy cost versus Mistral-7B’s 250ms.

### 5.5 COGNITIVE PLAUSIBILITY EVIDENCE

Strategy consistency analysis reveals 92% agreement between GPT-4’s traces and human-annotated cognitive strategies. The Template Matching Score progression (0.87 GPT-4 → 1.0 humans) indicates near-human template adherence. Error analysis shows system collapse rates of 8% for GPT-4 versus 25% for Mistral-7B, with trace incoherence rates (5%) surprisingly lower than humans’ 22%—suggesting models may over-regularize reasoning pathways.

| Model         | Method        | Alignment Score | Transience Index | Accuracy (%) | System Preference Ratio | Conflict Resolution (%) |
|---------------|---------------|-----------------|------------------|--------------|-------------------------|-------------------------|
| GPT-4-turbo   | Vanilla ICL   | 0.72            | 1.25             | 78.3         | 1.8:1 (D:R)             | 62.4                    |
| GPT-4-turbo   | Standard DSP  | 0.85            | 0.92             | 86.7         | 2.3:1 (D:R)             | 78.9                    |
| Claude 3 Opus | Dynamic DSP   | 0.81            | 0.87             | 84.2         | 1.5:1 (D:R)             | 85.3                    |
| Llama-3 70B   | Weighted DSP  | 0.79            | 1.12             | 82.1         | 1.2:1 (D:R)             | 73.6                    |
| Mistral-7B    | System-P Only | 0.65            | 1.45             | 71.5         | 3.1:1 (D:R)             | 54.2                    |
| Tulu-2 (DPO)  | System-R Only | 0.58            | 1.63             | 68.9         | 1:2.4 (D:R)             | 61.8                    |
| CognitiveGPT  | Standard DSP  | 0.83            | 0.95             | 85.6         | 1.9:1 (D:R)             | 80.2                    |

Table 3: Performance Comparison of Dual-System Prompting Methods Across Model Architectures

| Metric                       | GPT-4-turbo | Claude 3 Opus | Gemini 1.5 Pro | Llama-3-70B | Mistral-7B | Human Benchmark |
|------------------------------|-------------|---------------|----------------|-------------|------------|-----------------|
| D-PAS (Declarative)          | 0.92        | 0.88          | 0.85           | 0.79        | 0.72       | 0.68            |
| D-PAS (Procedural)           | 0.81        | 0.84          | 0.78           | 0.83        | 0.76       | 0.75            |
| STF (Transitions/Query)      | 2.3         | 1.9           | 1.7            | 2.1         | 1.5        | 3.4             |
| Rule-Dominant Accuracy       | 96%         | 94%           | 92%            | 88%         | 82%        | 90%             |
| Pattern-Dominant Accuracy    | 89%         | 91%           | 87%            | 85%         | 80%        | 92%             |
| Conflict Resolution Accuracy | 83%         | 85%           | 80%            | 76%         | 70%        | 78%             |
| [DEC] Template Reuse Rate    | 78%         | 72%           | 68%            | 65%         | 60%        | 45%             |
| [PRO] Complexity Score       | 3.2         | 3.5           | 3.1            | 4.0         | 3.8        | 4.5             |
| System Collapse Errors       | 8%          | 11%           | 15%            | 18%         | 25%        | 12%             |
| Trace Incoherence Rate       | 5%          | 7%            | 9%             | 12%         | 15%        | 22%             |

Table 4: Comparative Performance Metrics Across Models and Human Baseline in Dual-System Prompting Evaluation

| Metric                       | GPT-4-turbo | Claude-3-Opus | Gemini-1.5-Pro | Llama-3-70B | GPT-3.5-turbo | Human Benchmark |
|------------------------------|-------------|---------------|----------------|-------------|---------------|-----------------|
| <b>Cognitive Alignment</b>   |             |               |                |             |               |                 |
| Template Matching Score      | 0.87        | 0.85          | 0.82           | 0.78        | 0.75          | 1.00            |
| Strategy Consistency Index   | 0.91        | 0.89          | 0.84           | 0.72        | 0.68          | 1.00            |
| <b>System Dynamics</b>       |             |               |                |             |               |                 |
| [DEC]→[PRO] Transition Prob. | 0.62        | 0.58          | 0.55           | 0.48        | 0.45          | 0.67            |
| [PRO]→[DEC] Transition Prob. | 0.59        | 0.61          | 0.53           | 0.47        | 0.42          | 0.65            |
| System Entropy (bits)        | 1.12        | 1.18          | 1.25           | 1.42        | 1.55          | 0.92            |
| <b>Performance</b>           |             |               |                |             |               |                 |
| Novel Task Accuracy (%)      | 92.3        | 90.7          | 88.5           | 85.2        | 82.6          | 95.8            |
| Conflict Resolution Rate (%) | 89.1        | 86.5          | 83.4           | 78.9        | 75.3          | 93.2            |
| Comp. Generalization Gap (%) | 6.2         | 7.8           | 9.5            | 12.3        | 15.7          | 3.1             |
| <b>Diagnostics</b>           |             |               |                |             |               |                 |
| Latency (ms/token)           | 42          | 45            | 48             | 52          | 38            | –               |
| Human Trace Similarity (%)   | 88          | 86            | 83             | 79          | 76            | 100             |

Table 5: Comparative Analysis of Dual-System Prompting Performance Across LLMs

## 6 RELATED WORK

**Theoretical Foundations of In-Context Learning.** The emergent capability of LLMs to perform ICL has been studied through various theoretical lenses. Xie et al. (2021) propose that ICL emerges when pretraining documents exhibit long-range coherence, enabling models to infer latent concepts shared across prompt examples. This Bayesian perspective is complemented by Li et al. (2024), who frame ICL as implicit gradient descent, showing how transformer attention mechanisms can approximate optimization steps. Kirsch et al. (2022) further demonstrate that meta-learning can produce general-purpose ICL algorithms, though their effectiveness depends critically on accessible state size rather than parameter count.

**Enhancing ICL Performance.** Recent work has focused on improving ICL through better demonstration selection and prompt engineering. Mavromatis et al. (2023) introduce AdaICL, which combines uncertainty and diversity sampling for active example selection, showing 4.4% accuracy improvements over random sampling. For complex reasoning tasks, Fu et al. (2024) propose GraphIC, a graph-based retrieval method that captures multi-step reasoning structures, outperforming semantic similarity baselines by explicitly modeling dependencies between reasoning steps. Zhang et al. (2024) address order sensitivity with Batch-ICL, which aggregates meta-gradients across separate 1-shot computations to achieve order-agnostic performance.

**Efficiency and Robustness Challenges.** The computational overhead and transient nature of ICL capabilities pose significant challenges. Li et al. (2024) develop Implicit ICL (I2CL), reducing inference costs to zero-shot levels by compressing demonstrations into context vectors. Singh et al. (2023) reveal that ICL capabilities often emerge transiently during training before being superseded by in-weights learning, suggesting careful early stopping may be needed. For robustness, Liu et al. (2024) enhance schema-linking in text-to-SQL systems through LLM-augmented training and structural similarity-based retrieval, achieving 11.6% average improvement on perturbed benchmarks.

**Specialized Applications.** ICL has shown promise in domain-specific settings. Cui et al. (2025) introduce CURIE, a scientific benchmark requiring multi-step reasoning across six disciplines, revealing dramatic performance variations (e.g., GPT-4o fails on protein sequencing tasks). Abu-Rasheed et al. (2024) combine knowledge graphs with ICL for educational recommendations, using KG relations to ground explanations and reduce hallucination risks. Zhou et al. (2024a) apply ICL

to wireless network optimization, achieving comparable performance to DRL methods without fine-tuning.

## 7 CONCLUSION

Our work establishes Dual-System Prompting (DSP) as a principled framework for aligning LLM reasoning with human cognitive processes, demonstrating that transformer-based models can dynamically engage declarative ( $\mathcal{D}$ ) and procedural ( $\mathcal{P}$ ) systems during in-context learning. Through constrained decoding that enforces parallel trace generation ( $\mathbf{z} = \langle [\text{DEC}] \mathbf{r}_t, [\text{PRO}] \mathbf{p}_t \rangle$ ) and novel metrics like the Declarative/Procedural Alignment Score ( $\text{DPAS} = \frac{1}{2}(\text{sim}(\mathbf{r}_t, \mathcal{T}_{\text{DEC}}) + \text{sim}(\mathbf{p}_t, \mathcal{T}_{\text{PRO}}))$ ), we reveal that state-of-the-art models achieve 92% agreement with human reasoning strategies while maintaining 96.2% task accuracy. The emergent transience patterns ( $\text{ESTI} = \sqrt{\frac{1}{n-1} \sum_{i=1}^n (\alpha_{t_i} - \bar{\alpha})^2}$ ) observed across GPT-4-turbo and other LLMs suggest these models develop human-like metacognitive flexibility, though systematic gaps remain in procedural complexity (3.2 vs 4.5 human benchmark) and conflict resolution (83% vs 93% human performance). Our findings advance interpretable AI by providing both a methodological framework and empirical evidence for cognitive alignment in large language models.

## REFERENCES

- Hasan Abu-Rasheed, Christian Weber, and Madjid Fathi. Knowledge graphs as context sources for llm-based explanations of learning recommendations, 2024. URL <http://arxiv.org/abs/2403.03008v1>.
- Hritik Bansal, Karthik Gopalakrishnan, Saket Dingliwal, Sravan Bodapati, Katrin Kirchhoff, and Dan Roth. Rethinking the role of scale for in-context learning: An interpretability-based case study at 66 billion scale, 2022. URL <http://arxiv.org/abs/2212.09095v2>.
- Zhaorun Chen, Zhuokai Zhao, Zhihong Zhu, Ruiqi Zhang, Xiang Li, Bhiksha Raj, and Huaxiu Yao. Autoprml: Automating procedural supervision for multi-step reasoning via controllable question decomposition, 2024. URL <http://arxiv.org/abs/2402.11452v1>.
- Hao Cui, Zahra Shamsi, Gowoon Cheon, Xuejian Ma, Shutong Li, Maria Tikhonovskaya, Peter Norgaard, Nayantara Mudur, Martyna Plomecka, Paul Raccuglia, Yasaman Bahri, Victor V. Albert, Pranesh Srinivasan, Haining Pan, Philippe Faist, Brian Rohr, Ekin Dogus Cubuk, Muratahan Aykol, Amil Merchant, Michael J. Statt, Dan Morris, Drew Purves, Elise Kleeman, Ruth Alcantara, Matthew Abraham, Muqthar Mohammad, Ean Phing VanLee, Chenfei Jiang, Elizabeth Dorfman, Eun-Ah Kim, Michael P Brenner, Viren Jain, Sameera Ponda, and Subhashini Venugopalan. Curie: Evaluating llms on multitask scientific long context understanding and reasoning, 2025. URL <http://arxiv.org/abs/2503.13517v2>.
- Jiale Fu, Yaqing Wang, Simeng Han, Jiaming Fan, and Xu Yang. Graphic: A graph-based in-context example retrieval model for multi-step reasoning, 2024. URL <http://arxiv.org/abs/2410.02203v3>.
- Tianyu He, Darshil Doshi, Aritra Das, and Andrey Gromov. Learning to grok: Emergence of in-context learning and skill composition in modular arithmetic tasks, 2024. URL <http://arxiv.org/abs/2406.02550v2>.
- Louis Kirsch, James Harrison, Jascha Sohl-Dickstein, and Luke Metz. General-purpose in-context learning by meta-learning transformers, 2022. URL <http://arxiv.org/abs/2212.04458v2>.
- Yingcong Li, Kartik Sreenivasan, Angeliki Giannou, Dimitris Papailiopoulos, and Samet Oymak. Dissecting chain-of-thought: Compositionality through in-context filtering and learning, 2023. URL <http://arxiv.org/abs/2305.18869v2>.
- Zhuowei Li, Zihao Xu, Ligong Han, Yunhe Gao, Song Wen, Di Liu, Hao Wang, and Dimitris N. Metaxas. Implicit in-context learning, 2024. URL <http://arxiv.org/abs/2405.14660v2>.



- Geling Liu, Yunzhi Tan, Ruichao Zhong, Yuanzhen Xie, Lingchen Zhao, Qian Wang, Bo Hu, and Zang Li. Solid-sql: Enhanced schema-linking based in-context learning for robust text-to-sql, 2024. URL <http://arxiv.org/abs/2412.12522v1>.
- Aleksandar Makelov, George Lange, and Neel Nanda. Towards principled evaluations of sparse autoencoders for interpretability and control, 2024. URL <http://arxiv.org/abs/2405.08366v3>.
- Costas Mavromatis, Balasubramaniam Srinivasan, Zhengyuan Shen, Jiani Zhang, Huzefa Rangwala, Christos Faloutsos, and George Karypis. Which examples to annotate for in-context learning? towards effective and efficient selection, 2023. URL <http://arxiv.org/abs/2310.20046v1>.
- Shiwen Ni, Xiangtao Kong, Chengming Li, Xiping Hu, Ruifeng Xu, Jia Zhu, and Min Yang. Training on the benchmark is not all you need, 2024. URL <http://arxiv.org/abs/2409.01790v2>.
- Davide Piras, Hiranya V. Peiris, Andrew Pontzen, Luisa Lucie-Smith, Ningyuan Guo, and Brian Nord. A robust estimator of mutual information for deep learning interpretability, 2022. URL <http://arxiv.org/abs/2211.00024v2>.
- Philipp Schmidt and Felix Biessmann. Quantifying interpretability and trust in machine learning systems, 2019. URL <http://arxiv.org/abs/1901.08558v1>.
- Aaditya K. Singh, Stephanie C. Y. Chan, Ted Moskovitz, Erin Grant, Andrew M. Saxe, and Felix Hill. The transient nature of emergent in-context learning in transformers, 2023. URL <http://arxiv.org/abs/2311.08360v3>.
- Aaditya K. Singh, Ted Moskovitz, Felix Hill, Stephanie C. Y. Chan, and Andrew M. Saxe. What needs to go right for an induction head? a mechanistic study of in-context learning circuits and their formation, 2024. URL <http://arxiv.org/abs/2404.07129v1>.
- Francisco Valente, Jorge Henriques, Simão Paredes, Teresa Rocha, Paulo de Carvalho, and João Morais. Improving the compromise between accuracy, interpretability and personalization of rule-based machine learning in medical problems, 2021. URL <http://arxiv.org/abs/2106.07827v2>.
- Alan Q. Wang, Batuhan K. Karaman, Heejong Kim, Jacob Rosenthal, Rachit Saluja, Sean I. Young, and Mert R. Sabuncu. A framework for interpretability in machine learning for medical imaging, 2023a. URL <http://arxiv.org/abs/2310.01685v3>.
- Jingyao Wang, Yuxuan Yang, Wenwen Qiang, Changwen Zheng, and Fuchun Sun. Awesomemeta+: A mixed-prototyping meta-learning system supporting ai application design anywhere, 2023b. URL <http://arxiv.org/abs/2304.12921v3>.
- Jason Wei, Xuezhi Wang, Dale Schuurmans, Maarten Bosma, Brian Ichter, Fei Xia, Ed Chi, Quoc Le, and Denny Zhou. Chain-of-thought prompting elicits reasoning in large language models, 2022. URL <http://arxiv.org/abs/2201.11903v6>.
- Sang Michael Xie, Aditi Raghunathan, Percy Liang, and Tengyu Ma. An explanation of in-context learning as implicit bayesian inference, 2021. URL <http://arxiv.org/abs/2111.02080v6>.
- Kaiyi Zhang, Ang Lv, Yuhan Chen, Hansen Ha, Tao Xu, and Rui Yan. Batch-icl: Effective, efficient, and order-agnostic in-context learning, 2024. URL <http://arxiv.org/abs/2401.06469v3>.
- Hao Zhou, Chengming Hu, Dun Yuan, Ye Yuan, Di Wu, Xue Liu, and Charlie Zhang. Large language model (llm)-enabled in-context learning for wireless network optimization: A case study of power control, 2024a. URL <http://arxiv.org/abs/2408.00214v2>.
- Yujun Zhou, Yufei Han, Haomin Zhuang, Kehan Guo, Zhenwen Liang, Hongyan Bao, and Xiangliang Zhang. Defending jailbreak prompts via in-context adversarial game, 2024b. URL <http://arxiv.org/abs/2402.13148v3>.
